## **Assessment of impact of COVID-19 outbreak & lockdown on mental health status & its associated risk and protective factors in adult Indian population**

Saikarthik Jayakumar<sup>a</sup>, Saraswathi Ilango<sup>b</sup>, Siva Thirusangu<sup>c</sup>

Author Affiliation:

<sup>a</sup> Assistant Professor of Anatomy, Majmaah University, Saudi Arabia

<sup>b</sup> PhD Research Scholar, Bharath Institute of Higher Education and Research, India

<sup>c</sup> Tutor in Anatomy, Sri Ramachandra Medical College and Research Centre, India

Corresponding Author:

Dr Saikarthik Jayakumar PhD, MRSB (UK),

Assistant Professor of Anatomy,

Department of Basic Medical Sciences,

Majmaah University,

Kingdom of Saudi Arabia

Ph: +966 531272304

Email: [s.jaya@mu.edu.sa](mailto:s.jaya@mu.edu.sa)

## Abstract

Nationwide lockdown to tackle the COVID-19 outbreak in India is anticipated to have psychological impact on the population. Our study aims to study the effect of the outbreak & lockdown on mental health status of adult Indian population along with identifying high risk groups. An online survey was conducted during 3<sup>rd</sup> phase of lockdown gathering details about sociodemographic variables, precautionary measures, awareness and concerns regarding COVID-19 and mental health status through DASS21 questionnaire from 873 adults. The prevalence of depression, anxiety and stress were 18.56%, 25.66%, and 21.99% respectively with majority being mild depression (15.1%) and stress (14.5%) and moderate anxiety (16.3%). Female gender, age <25 years, unemployment, self-business, employed in private sector, lack of formal education, larger household size, parenthood (>2 kids) were associated with increased likelihood of negative mental health. Confidence in physician's ability to diagnose COVID-19 infection, decreased self-perceived likelihood of contracting COVID-19, lesser frequency of checking for information on COVID-19 and satisfaction of information received were protective against negative mental health. This landmark study identified the protective and risk factors of mental health during COVID-19 pandemic, to help authorities and mental health workers to strategize and deliver interventional methods to maintain psychosocial wellbeing of the population.

Keywords: COVID-19; lockdown; mental health; risk factors; protective factors; DASS21

## 1. Introduction

COVID-19 outbreak, caused by a novel corona virus, SARS-CoV-2, which originated from China, has spread worldwide, earning the pandemic status by WHO on March 11, 2020 (WHO, 2020e). As on the 1<sup>st</sup> week of June, 2020, India has emerged as the fifth hardest hit country with 247,000 confirmed cases of COVID-19 and 7000 deaths (Press, 2020). Droplets, contact with immediate environment around infected persons including direct or indirect and airborne in specific circumstances are the main proposed routes of transmission (WHO, 2020c). The incubation period was found to be longer, up to 14 days (mean 6.4 days) (WHO, 2020a). Fever, dry cough, fatigue, difficulty in breathing, chest pain/pressure, sore throat, head ache, diarrhoea, nasal congestion are some of the symptoms noted in COVID-19 infected patients. (WHO, 2020d) In severe cases, the patients developed cardiac injury, pneumonia, acute respiratory distress syndrome and finally death with the fatality rate of the disease being 2.3% (Petrosillo et al., 2020). Older individuals (average 47 to 56 years) and individuals with chronic comorbidities were found to be more susceptible to this infection (Coronavirus, 2019).

As of now, there are no specific medicines or vaccines available for COVID-19. To tackle this, the Government of India announced a 21-day lockdown on 24<sup>th</sup> March followed by a second phase from April 14 to May 3, 2020 and third phase from May 4<sup>th</sup> to 17<sup>th</sup> 2020. Though quarantine and lockdown have epidemiological advantages like containing the spread of infection, which is critical in the present scenario, it is also accompanied by potential psychological distress in the population. Isolation, fear of contracting the disease, confusion created by rumours, financial strain, apprehension regarding job security, boredom, frustrations, lack of freedom and space due to restrictions, alcohol withdrawal, concerns for the family members that occurs during lock down period could affect the mental health of the population to varying degrees. Studies prove that depression and anxiety are associated with suicidal tendencies (Sagar et al., 2020). It was found that around 338 deaths have occurred in India from March 19 till May 2 2020, triggered by the lockdown (PTI, 2020).

With the lock down in effect for more than a month in India, its psychological impact on the population is inevitable. Studies conducted during earlier epidemics like SARS, equine influenza, Ebola have noted that there was increased psychological distress due to the epidemic and quarantine(Hawryluck et al., 2004; Taylor et al., 2008). Similarly, studies conducted recently in other countries like China, Italy, Iran have noted increased prevalence of mental health disorders like depression, anxiety, stress and sleep disturbances during COVID-19 outbreak(Mazza et al., 2020; Moghanibashi-Mansourieh, 2020; Wang et al., 2020a; Wang et al., 2020b). A recent survey conducted on March 2020 in India, has found that more than three fourth of the study participants had self-perceived need for help for their mental well-being(Roy et al., 2020). In addition to the already present financial burden related to mental illnesses and the current economic crisis due to the lockdown, addressing, preventing psychological issues due to COVID-19 and providing mental health care to the vulnerable population is of paramount importance to the nation.

Till date, very few studies have been conducted on the psychological impact of COVID-19 outbreak & lockdown in India, either focusing on specific areas like perceived mental health care need(Roy et al., 2020) and effect of gender and marital status(Suseela, 2020), or conducted on specific population like healthcare workers(Chew et al., 2020) and pharmacy students(Suryadevara et al., 2020). However, there are no studies conducted to assess the impact of COVID-19 outbreak & lockdown on the mental health status of the general population of India with emphasis on the risk factors and protective factors. Our study aims to assess the prevalence of affective components of mental health viz. depression, anxiety and stress along with identifying the high-risk group of population. We believe our study would help the authorities and mental health professionals in strategizing and delivering mental healthcare to the population targeting on the high-risk group and help maintaining the psychosocial well-being of the Indian population in these unprecedented and desperate times.

## 2. Methodology

### 2.1 Study design and participants

The study was a cross sectional survey conducted through an online survey platform. The invite link to attend the survey was distributed in social networks like Facebook, WhatsApp and Telegram. Only adult (age above 18 years), Indian residents were invited. The objective of the study was explained, and the consented participants filled out the survey and could quit the survey as and when needed. The entire survey was in English and a tentative average time duration needed to fill out the survey was mentioned beforehand (15-20 minutes). The anonymity of the participants was maintained.

### 2.2 Survey development and Data collection

The survey included a self-administered questionnaire which was developed after extensive literature survey and included questions pertaining to sociodemographic variables and COVID-19 outbreak & lockdown related variables. Nonprobability snowball sampling method was used, and the data collected between May 5<sup>th</sup> to 14<sup>th</sup>, 2020 during the third phase of lockdown in India was taken for this study. The data collected were grouped in to three which included sociodemographic variables, variables related to COVID-19 outbreak & lockdown and mental health status of the participants.

#### 2.2.1 Sociodemographic variables

First part of the data included sociodemographic variables like gender, age, educational status, employment status, marital status, monthly income, parental status and household size.

### 2.2.2 COVID-19 outbreak & lockdown related variables

The second part of the data included the variables related to COVID-19 outbreak & lockdown like (a) practice of personal precautionary measures such as wearing masks and gloves while being outside in public places and frequency of hand washing with soap or sanitizer per day, The participants were asked if they or any of their peers got tested for COVID-19 (b) awareness and knowledge regarding COVID-19 pandemic including, route of transmission, means of gathering information, frequency of checking for information and level of satisfaction of the attained information, (c) personal concerns regarding the outbreak like level of confidence in the concerned physician to diagnose COVID-19 infection, self-perceived likelihood of contracting COVID-19 and surviving if contracted with COVID-19 and concerns for one's family members to contract the infection.

### 2.2.3 Psychological status of the participants

The third part of the survey includes the assessment of affective component of mental health of the participants viz depression, anxiety and stress. Depression, anxiety and stress were measured by Lovibond and Lovibond's short version of the Depression Anxiety Stress Scale 21 (DASS21). DASS21 is a reliable instrument used in clinical and nonclinical samples which can not only measure but also differentiate between the three negative emotional states (Bottesi et al., 2015; Henry and Crawford, 2005). The sub scores for depression, anxiety and stress were summed up and categorized into "normal", "mild", "moderate", "severe" and "extremely severe". Cut-off score of  $\geq 10$  for depression,  $\geq 8$  for anxiety and  $\geq 15$  for stress were considered to be having the aforesaid disorders. (Lovibond and Lovibond, 1995)

## 3. Statistical analysis

Analysis was performed using Statistical Package for Social Sciences (SPSS) (V.26.0, IBM, New York, USA). Descriptive analysis was performed for all variables in this study. Depression, anxiety and stress scores were expressed as mean and SDs. Test of normality was performed for all the three subscale scores. Multicollinearity was checked between independent variables and the variance inflation factor (VIF) was found to be less than 3.

To explore potential predictors for depression, anxiety and stress, binomial logistic regression analysis of each independent variable was performed separately, and the results were expressed as crude odds ratio (cOR) with 95% confidence interval (CI) and P value. This was followed by Multivariate binomial logistic regression analysis using 'stepwise forward LR' technique, which included independent variables which were found to be significant ( $P < 0.25$ , Hosmer-Lemeshow recommendation) by univariate analysis. The regression analysis was performed in two blocks, sociodemographic variables block, and COVID-19 outbreak & lockdown related factors block. The latter block was explored after controlling for the significant sociodemographic factors. The results were expressed as Wald test value, adjusted odds ratio (aOR) with 95% confidence interval and P value ( $P < 0.05$  was considered statistically significant).

## 4. Results and Discussion

### 4.1 Descriptive characteristics of the study population

968 responses were received, out of which 64 responses were incomplete, 25 respondents were underage, and 6 respondents were of a different nationality and were hence excluded from the study. The final sample size was 873. The survey included participants throughout India, with the majority being from the southern states (Figure 1). We had an almost even participation from males (54.1%) and females (45.9%) in our survey. Majority of the participants were of age group 18 to 45 years (85.1%) with the average age of  $33.6 \pm 12.15$  years. The descriptive statistics of the study population is shown in Table 1.

In our study, the average score for the three subscales were, depression:  $5.02 \pm 4.96$  anxiety:  $4.41 \pm 3.41$  and for stress:  $7.77 \pm 7.42$ . Out of the 873 participants, 162 (18.56%) had symptoms of depression with the majority having mild depression (15.1%), 224 (25.66%) had symptoms of anxiety where, participants with moderate anxiety predominated (16.3%) and 192 (21.99%) had symptoms of stress with the maximum in mild stress category (14.5%) (Figure-2). Our results were considerably higher than the prevalence of these negative components of psychological health assessed by other studies in the population, before the pandemic (Charlson et al., 2016; Pradeep et al., 2018) while being similar to the findings by other studies which explored the mental health status in other countries during COVID-19 pandemic (Mazza et al., 2020; Wang et al., 2020a) and SARS pandemic (Hawryluck et al., 2004).

#### 4.2 Association between sociodemographic, COVID-19 outbreak & lockdown related variables and mental health status

From the results obtained from the initial binomial logistic regression, marital status (Table-2), wearing masks and gloves in public places, awareness of increase in number of COVID-19 cases, Satisfaction with the information received daily regarding COVID-19 outbreak (Table-3) were excluded in the final model for depression. Multiple logistic regression model for depression using stepwise forward LR method was statistically significant,  $\chi^2(52) = 594.77$ ,  $P < 0.000$ . The model explained 80.1% (Nagelkerke  $R^2$ ) of the variance in depression and correctly classified 94.6% of cases. Six variables were found to be significant predictors including female gender, parental status, frequency of hand washing per day, level of satisfaction with the information received daily about the pandemic, level of confidence on the physician to diagnose COVID-19 infection and likelihood of contracting COVID-19 during the outbreak (Table-4).

According to bivariate logistic regression analysis, among the sociodemographic variables, marital status (Table-2) and among pandemic/quarantine influenced factors wearing masks and gloves in public places, awareness of increase in number of COVID-19 cases, Likelihood of surviving, if infected with COVID-19 (Table-3) were excluded from the final model for anxiety. The multiple logistic regression model for anxiety using stepwise forward LR method showed significant goodness of fit to our observed data,  $\chi^2(48) = 455.7$ ,  $P < 0.000$ . The model explained 59.8% (Nagelkerke  $R^2$ ) of the variance in anxiety and correctly classified 86.8% of cases. The significant predictors for anxiety were found to be female gender, educational status, employment status, frequency of checking for information regarding COVID-19 per day, level of confidence on the physician to diagnose COVID-19 infection and likelihood of contracting COVID-19 during the outbreak (Table-5).

Wearing masks and gloves in public places, awareness of increase in number of COVID-19 cases were excluded from the final model for stress based on bivariate logistic regression analysis. The multiple logistic regression model for stress using stepwise forward LR method showed significant goodness of fit to our observed data,  $\chi^2(54) = 621.77$ ,  $P < 0.000$ . The model explained 78.2% (Nagelkerke  $R^2$ ) of the variance in stress and correctly classified 92.1% of cases. Five variables were found to be significant predictors including age of the

participants, marital status, household size, level of confidence on the physician to diagnose COVID-19 infection and risk of contracting COVID-19 (Table-6).

From our results, we found that, females were 1.7 times more likely to be present with depressive symptoms (cOR-1.667), 2.6 times more likely to show symptoms of anxiety (cOR-2.624) and twice as likely to show stress symptoms (cOR-2.075) when compared to males but when adjusted for other confounding factors, females were quadruple times as likely as males to have symptoms of depression (aOR-3.924) and 3.5 times as likely as males to have anxiety (aOR-3.483). Our results are similar to previous studies conducted during SARS and COVID-19 pandemic in Italy and China, where the prevalence of psychological disorders were steadily associated with the female gender.(Hawryluck et al., 2004; Mazza et al., 2020; Wang et al., 2020a) This trend was noted in India before the outbreak too where the prevalence in depression and anxiety disorders were more in females than males and the outbreak and imposed lockdown has not been seen to change the trend(Sagar et al., 2020). Surprisingly, there was no significant association between gender and likelihood of stress. This is in accordance with studies conducted during earlier epidemic/pandemic situations, where there was no significant association between gender and psychological distress (Su et al., 2007; Taylor et al., 2008). From our results, it is clear that there should be gender specific help and counselling offered to mitigate the psychological strain in the population.

An interesting finding in our study was the variation in association between age and depression, anxiety and stress. Age of the participants was significantly associated with all three domains, where adult Indians of age 36 to 45 years were 1.5 times more likely to have depression (cOR-1.509) and individuals of 46 to 55 years of age were 2.5 times as likely to have anxiety (cOR-2.503) when compared to young adults of age 18 to 25 years. There was also an increase in likelihood of stress with increase in age (36 to 45 years-cOR-1.708, 46 to 55 years-cOR-5.524) with slight decrease in higher risk of stress in age above 55 years (cOR-2.599). However, when controlled for other factors, individuals above 25 years of age were found to be less likely to exhibit symptoms of stress when compared to younger adults of age below 25 years (Table-6). This finding is similar to other studies conducted in similar situations where younger age was found to associated with increased likelihood of stress and psychological distress.(Mazza et al., 2020; Taylor et al., 2008) The probable reason could be that young adults are vulnerable, with lesser life experiences and hence may have trouble coping with drastic societal changes during the outbreak and lockdown. They are also the ones who are more active in social media which is swarming with rumours, which in turn induces fear, anxiety and other associated psychological effects. Special focus in identifying and providing mental health help for this age group individuals who are the future pillars of the nation is imperative.

We found that, with the increase in level of educational status there was lower likelihood of anxiety but not depression and stress. Those with higher educational qualification were found to be less likely to show anxiety symptoms when compared to those who had none (higher secondary school - cOR-0.337, master's degree - aOR-0.108). Our finding is similar to the studies conducted both before and in relation to a pandemic/epidemic state(Bjelland et al., 2008; Hawryluck et al., 2004; Sagar et al., 2020; Wang et al., 2020a). Educational status influences the occupation and income of the individual, which are in turn associated with psychosocial wellbeing. Thus, the psychosocial distress in the population during this time of crisis, might be the possible cause for individuals without formal education to be more at risk of developing anxiety. Counselling, guidance or any form of mental health help should include verbal or pictorial representations to aid this group of population.

In our study, marital status was significantly associated with stress and not with depression and anxiety. Married individuals were 2.5 times as likely (aOR-2.502) and widowed/separated individuals were 10 times as likely as single ones (aOR-10.411) to have stress symptoms. This is in contrary to the studies conducted in China, Iran and Italy during COVID-19 pandemic and in Canada during SARS epidemic, where there was no association between marital status and negative mental status(Hawryluck et al., 2004; Mazza et al., 2020; Moghanibashi-Mansourieh, 2020; Wang et al., 2020a). However, in India, being married was found to be strongly associated (6 times as likely as single individuals) with increase in the prevalence of mental health disorders in women unlike other neighbouring countries like China and other high resourced countries(Patel et al., 2006). Negative psychological effects were observed in separated and widowed individuals(Carr and Springer, 2010). This trend seems to be continuing during the COVID-19 quarantine as well which is evident from our results. The limitation being the duration of separation/widowhood was not ascertained as most effects are short term followed by adjustment. The nature of the marriage, whether unsatisfactory or abusive, contributes more to negative mental health which was not taken to consideration in our study(Carr and Springer, 2010). Married, separated/widowed individuals should be given additional help in combating psychological distress during this pandemic.

Employment status was significantly associated with depression, anxiety and stress where being unemployed and employed as self or in private sector were found to have higher risk of negative mental health when compared to students. When adjusted for other confounders, unemployed individual were 5 times more likely (aOR-5.335) followed by individuals in self business who were 4 times as likely (aOR-4.222) and private sector employees who were 3.75 times (aOR-3.757) as likely to have anxiety symptoms when compared to the reference group, students. This is in contrary to the findings by Wang et al., who found that the student population suffered from higher levels of depression, anxiety and stress during COVID-19 pandemic in China(Wang et al., 2020a). With the quarantine in effect, there are a lot of uncertainties among the population regarding job safety especially in the private sector and self-business is affected worse due to the lockdown and curfew. All these in addition with the financial strain posed by the quarantine could be the cause for high prevalence of anxiety in the said population. Another reason could be the timeline of the survey, where ours was during early May 2020, Wang et al., survey was in the early February 2020. With the educational system taking robust steps in continuing education through various online platforms, the psychological distress on the students could have reduced.

Monthly income was significantly associated with depression, anxiety and stress where higher income was found to be protective against negative mental health components. Individuals with monthly income above 100,000INR was less likely to have depression (cOR-0.350) and stress (cOR-0.430) when compared to individuals with income less than 10,000INR per month. This is in accordance with previous studies in India where there was an inverse relation between income and common mental disorders.(Cheng et al., 2016) However, when adjusted for the effects of confounders, there was no independent association between monthly income and depression, anxiety and stress. The relative financial stability in the high-income population could be the factor for decrease in the psychological distress in the said population.

In our final regression model, having two kids posed lesser risk of depression when compared to having 3 or more kids (aOR-0.189), while there was no significant association in case of anxiety and stress. However in bivariate analysis, not having kids and having 1 or 2 kids were found to have protective effect against depression and anxiety and having one kid or none were found to have protective effect against stress when compared to having 3

or more children though the degrees were very minimal as evident from the cOR (Table-2). There are varied reports regarding the association between number of kids and psychological distress. Not having kids were associated with depression during COVID-19 pandemic in Italy (Mazza et al., 2020) while having three or more kids were associated with lesser risk of psychological distress during equine influenza epidemic in Australia (Taylor et al., 2008) and having kids was not associated with depression during SARS quarantine in Canada (Hawryluck et al., 2004). With the kids being home-schooled, burden on the parents have increased and could be a cause for increase in psychological distress which may be higher with more number of kids. A limitation in our survey is that the age group of the kids were not collected which could have helped with the further validation of the result.

Household size of two members was found to be protective against depression and anxiety and household size of 2 members, 3 to 6 members were protective against stress when compared to bigger household size. When controlled for confounders, individuals from the smaller family size viz. one member (aOR-0.136), 2 members (aOR-0.213) and 3 to 6 members (aOR-0.352) were found to be less likely to have symptoms of stress when compared to individuals from family size of more than 6 members. This is in contrary to a previous study in China where there was no association between household size and psychological distress (Wang et al., 2020a; Wang et al., 2020b). With the larger family size, lack of personal space and increased financial strain posed by the lock down could be the possible reason behind our results. Household size should be taken into consideration by the mental health professionals while offering guidance and counselling.

In our study, practice of specific precautionary measures like frequency of washing hands with soap and sanitizer per day was found to be significantly related to depression, anxiety and stress while wearing masks and gloves while being outside in public places had no association when not controlled for confounders. In the final regression model however, less frequency of washing hands (less than 15 times) was associated with lesser likelihood of anxiety when compared to washing hands more than 15 times a day. This is similar to the study by Leung et al., conducted during SARS epidemic in Hong Kong and Singapore where anxiety was associated with increase in practice of preventive measures (Leung et al., 2009). In a survey by Roy et al., conducted during 2020 March 22<sup>nd</sup> -24<sup>th</sup> in India, 75% of the respondents were found to use gloves and sanitizers while in our study, the number of individuals who do not wear masks and gloves while being outside in public places was 11.8% which is higher when compared to the percentage (3.2%) in the neighbouring country China (Roy et al., 2020; Wang et al., 2020a). Despite an increase in awareness among the Indian population regarding personal hygiene and precautionary measures in a month, ways to create awareness should be furthermore intensified for optimal results. There were 28.9% of participants who were not aware that the COVID-19 infection could spread through droplets, 22.1% was not aware that contact with infected persons and 32.3% were not aware that contact with contaminated objects are possible routes of transmission of COVID-19. This lack of awareness could be related to the laxity in practicing personal hygiene and precautionary measures. Though WHO has advised only to use masks if the person is coughing or sneezing or in case of taking care of COVID-19 infected persons, wearing masks and gloves could have an advantage of offering a sense of being on guard and safety for the individuals when surrounded by so many insecurities and uncertainties like the current situation (WHO, 2020b). It was also found that wearing masks and gloves was associated with decreased likelihood of anxiety and depression during COVID-19 pandemic in China (Wang et al., 2020a).

Those who had a lesser frequency of checking for information (less than 5 times a day) about COVID-19 were found to be less likely to show symptoms of anxiety when compared



to those who checked for more than 21 times a day (aOR-0.410). 74% of the respondents gathered information about the pandemic through internet including social media which gives many inconsistent and fake news which are difficult to differentiate from authentic news. This causes fear and increases the level of anxiety. The level of satisfaction of the information received about COVID-19 was significantly associated with depression. Individuals who were satisfied with the information received were found to be less likely to show depression symptoms (aOR-0.405) which was similar to the findings in China(Wang et al., 2020a). Indian government has made initiatives like information outreach campaigns involving Google and other social media, SOS Alerts, country-specific Search Trends pages and a promo card on the YouTube Homepage that links out to the Ministry of Health & Family Welfare website for up-to-date authentic information(Agarwal, 2020). The population should be urged to follow authentic news provided by reliable sources to avoid psychological distress.

Another interesting finding in our study is that those who felt confident on the physician's ability to diagnose COVID-19 infection were found to be less likely to have symptoms of depression (aOR-0.328), anxiety (aOR-0.295) and stress (aOR-0.807), similar to previous study in China (Wang et al., 2020a; Wang et al., 2020b). The confidence in the physician's ability gives a sense of security to the individuals and hence reduces fear and psychological distress.

Individuals who expressed that they were not likely to contract COVID-19 during this outbreak were less likely to have symptoms of depression (aOR-0.151), anxiety (aOR-0.777) and those who thought they were likely to contract COVID-19 were more likely to have symptoms of stress (aOR-1.115). Similarly, the participants who thought that it was highly not likely for them to survive if infected were found to be more likely to have depression (cOR-2.783) and stress symptoms (cOR-3.064) while those who thought it was likely for them to survive had lower levels of anxiety (cOR-0.668) and stress (cOR-0.538). We also found that individuals who were not concerned about their family members contracting COVID-19 during this outbreak were less likely to show symptoms of depression (cOR-0.049), anxiety (cOR-0.232, 95% CI 0.056-0.959) and stress (cOR-0.136). Our findings are similar to previous studies where low levels of perceived likelihood of contracting COVID-19 and surviving the pandemic if infected were protective against depression, anxiety and stress(Wang et al., 2020a; Wang et al., 2020b). These concerns should be considered by the mental health workers when providing mental health help for the population.

## 5. Limitations

Our study is limited by the cross-sectional nature and the non-availability of the control group. The longitudinal effects of the pandemic and lockdown is not ascertained, though the survey is ongoing. The study participants included only those who had access to internet and those who could respond in English. This could have limited the participation, though our survey also included participants without any formal education and covered almost the entire nation. Another limitation was that none of our participants were tested positive for COVID-19 and neither had any contact history with known COVID-19 patients. Thus, our findings may not be generalised to the COVID-19 infected patients and their peers.

## 6. Conclusion

To our knowledge, our study is the first to assess the mental health status of the adult Indian population during COVID-19 outbreak & lockdown along with identifying the possible risk and protective factors. During the third phase of the lock down, less than one fifth of the adult Indian population suffered from depression, one fourth suffered from anxiety and more

than one fifth suffered from stress, with the majority suffering from mild level of depression and stress and moderate level of anxiety. Females were more likely to suffer from depression and anxiety when compared to males. Employment in the government sector and higher educational status were protective against anxiety. Age above 25 years, smaller household size and single status were associated with decrease levels of stress. Parents with lesser number of kids ( $\leq 2$ ) or none were less likely to suffer from depression when compared to parents with more than 2 kids. Increased levels of confidence in physician's ability to diagnose COVID-19 infection, decreased self-perceived likelihood of contracting the infection were associated with decreased levels of depression, anxiety and stress. Less frequency of checking for information on COVID-19 was associated with decreased levels of anxiety and satisfaction of information received about COVID-19 pandemic was associated with decreased levels of depression.

We are in unparalleled times facing uncertainties and threats and hence the psychological effects are comprehensible. It is inadvertent to think that the psychological effects of the outbreak would be lifted along with the lock down. There is a looming economic crisis and the ripple caused by the outbreak & lockdown will be continuing far into the future. Hence, providing mental health support to the population, targeting specific groups which are more vulnerable is crucial. Our study provides an expansive assessment of risk and protective factors affecting the mental health of the population, which would help to design strategies and interventional methods to address and mitigate the negative impact of COVID-19 outbreak & lockdown on the mental health of the population and help prevent the same.

Funding: Nil

Conflict of Interest: Nil

Acknowledgement: The authors would like to thank all the participants in this study. The authors would like to thank the Deanship of Scientific Research, Majmaah University for the support of this project.

## References

- Agarwal, S., 2020. Covid-19 pandemic: Govt talks to Facebook, Google, WhatsApp for virus information blitz in: Bureau, E. (Ed.), Business News ed. The Economic Times, New Delhi.
- Bjelland, I., Krokstad, S., Mykletun, A., Dahl, A.A., Tell, G.S., Tambs, K., 2008. Does a higher educational level protect against anxiety and depression? The HUNT study. *Social science & medicine* 66 (6), 1334-1345.
- Bottesi, G., Ghisi, M., Altoè, G., Conforti, E., Melli, G., Sica, C., 2015. The Italian version of the Depression Anxiety Stress Scales-21: Factor structure and psychometric properties on community and clinical samples. *Compr Psychiatry* 60, 170-181.
- Carr, D., Springer, K.W., 2010. Advances in Families and Health Research in the 21st Century. *Journal of Marriage and Family* 72 (3), 743-761.
- Charlson, F.J., Baxter, A.J., Cheng, H.G., Shidhaye, R., Whiteford, H.A., 2016. The burden of mental, neurological, and substance use disorders in China and India: a systematic analysis of community representative epidemiological studies. *The Lancet* 388 (10042), 376-389.
- Cheng, H.G., Shidhaye, R., Charlson, F., Deng, F., Lyngdoh, T., Chen, S., Nanda, S., Lacroix, K., Baxter, A., Whiteford, H., 2016. Social correlates of mental, neurological, and substance use disorders in China and India: a review. *The Lancet Psychiatry* 3 (9), 882-899.

- Chew, N.W., Lee, G.K., Tan, B.Y., Jing, M., Goh, Y., Ngiam, N.J., Yeo, L.L., Ahmad, A., Khan, F.A., Shanmugam, G.N., 2020. A multinational, multicentre study on the psychological outcomes and associated physical symptoms amongst healthcare workers during COVID-19 outbreak. *Brain, behavior, and immunity*.
- Coronavirus, W.N., 2019. Situation Report–22. World Health Organization. <https://www.who.int/docs/default-source/coronaviruse/situation-reports/20200211-sitrep-22-ncov.pdf>.
- Hawryluck, L., Gold, W.L., Robinson, S., Pogorski, S., Galea, S., Styra, R., 2004. SARS control and psychological effects of quarantine, Toronto, Canada. *Emerging Infectious Diseases* 10 (7), 1206.
- Henry, J.D., Crawford, J.R., 2005. The short-form version of the Depression Anxiety Stress Scales (DASS-21): Construct validity and normative data in a large non-clinical sample. *British journal of clinical psychology* 44 (2), 227-239.
- Leung, G.M., Quah, S., Ho, L.M., Ho, S.Y., Hedley, A.J., Lee, H.P., Lam, T.H., 2009. Community psycho-behavioural surveillance and related impact on outbreak control in Hong Kong and Singapore during the SARS epidemic. *Hong Kong Med J* 15 Suppl 9, 30-34.
- Lovibond, P.F., Lovibond, S.H., 1995. The structure of negative emotional states: Comparison of the Depression Anxiety Stress Scales (DASS) with the Beck Depression and Anxiety Inventories. *Behaviour research and therapy* 33 (3), 335-343.
- Mazza, C., Ricci, E., Biondi, S., Colasanti, M., Ferracuti, S., Napoli, C., Roma, P., 2020. A Nationwide Survey of Psychological Distress among Italian People during the COVID-19 Pandemic: Immediate Psychological Responses and Associated Factors. *International Journal of Environmental Research and Public Health* 17 (9), 3165.
- Moghanibashi-Mansourieh, A., 2020. Assessing the anxiety level of Iranian general population during COVID-19 outbreak. *Asian J Psychiatr* 51, 102076.
- Patel, V., Kirkwood, B.R., Pednekar, S., Weiss, H., Mabey, D., 2006. Risk factors for common mental disorders in women. Population-based longitudinal study. *Br J Psychiatry* 189, 547-555.
- Petrosillo, N., Viceconte, G., Ergonul, O., Ippolito, G., Petersen, E., 2020. COVID-19, SARS and MERS: are they closely related? *Clinical microbiology and infection : the official publication of the European Society of Clinical Microbiology and Infectious Diseases* 26 (6), 729-734.
- Pradeep, B.S., Gururaj, G., Varghese, M., Benegal, V., Rao, G.N., Sukumar, G.M., Amudhan, S., Arvind, B., Girimaji, S., Vijayasagar, K.J., 2018. National mental health survey of India, 2016-rationale, design and methods. *PLoS One* 13 (10), e0205096.
- Press, T.C., 2020. Asia Today: India sees 10,000 new cases ahead of reopenings. The Canadian Press, New Delhi.
- PTI, 2020. Suicide leading cause for over 300 lockdown deaths in India: Study. The New Indian Express, New Delhi.
- Roy, D., Tripathy, S., Kar, S.K., Sharma, N., Verma, S.K., Kaushal, V., 2020. Study of knowledge, attitude, anxiety & perceived mental healthcare need in Indian population during COVID-19 pandemic. *Asian journal of psychiatry* 51, 102083-102083.
- Sagar, R., Dandona, R., Gururaj, G., Dhaliwal, R., Singh, A., Ferrari, A., Dua, T., Ganguli, A., Varghese, M., Chakma, J.K., 2020. The burden of mental disorders across the states of India: the Global Burden of Disease Study 1990–2017. *The Lancet Psychiatry* 7 (2), 148-161.
- Su, T.P., Lien, T.C., Yang, C.Y., Su, Y.L., Wang, J.H., Tsai, S.L., Yin, J.C., 2007. Prevalence of psychiatric morbidity and psychological adaptation of the nurses in a structured SARS caring unit during outbreak: a prospective and periodic assessment study in Taiwan. *J Psychiatr Res* 41 (1-2), 119-130.
- Suryadevara, V., Adusumalli, C., Adusumilli, P.K., Chalasani, S.H., Radhakrishnan, R., 2020. Mental Health Status among the South Indian Pharmacy Students during Covid-19 Pandemic Quarantine Period: A Cross-Sectional Study. medRxiv.

- Suseela, V., 2020. Psychological Issues Based on Gender and Marital Status During Covid-19 Lockdown Period. Tathapi with ISSN 2320-0693 is an UGC CARE Journal 19 (8), 755-764.
- Taylor, M.R., Agho, K.E., Stevens, G.J., Raphael, B., 2008. Factors influencing psychological distress during a disease epidemic: data from Australia's first outbreak of equine influenza. BMC Public Health 8, 347.
- Wang, C., Pan, R., Wan, X., Tan, Y., Xu, L., Ho, C.S., Ho, R.C., 2020a. Immediate psychological responses and associated factors during the initial stage of the 2019 coronavirus disease (COVID-19) epidemic among the general population in China. International Journal of Environmental Research and Public Health 17 (5), 1729.
- Wang, C., Pan, R., Wan, X., Tan, Y., Xu, L., McIntyre, R.S., Choo, F.N., Tran, B., Ho, R., Sharma, V.K., 2020b. A longitudinal study on the mental health of general population during the COVID-19 epidemic in China. Brain, behavior, and immunity.
- WHO, 2020a. Coronavirus disease 2019 (COVID-19) Situation Report – 73, Geneva.
- WHO, 2020b. Coronavirus disease (COVID-19) advice for the public: When and how to use masks, Geneva.
- WHO, 2020c. Modes of transmission of virus causing COVID-19: implications for IPC precaution recommendations Geneva.
- WHO, 2020d. Q&A on coronaviruses (COVID-19), Geneva.
- WHO, 2020e. Rolling updates on coronavirus disease (COVID-19), Geneva.

Figure 1: Geographical distribution of the study population

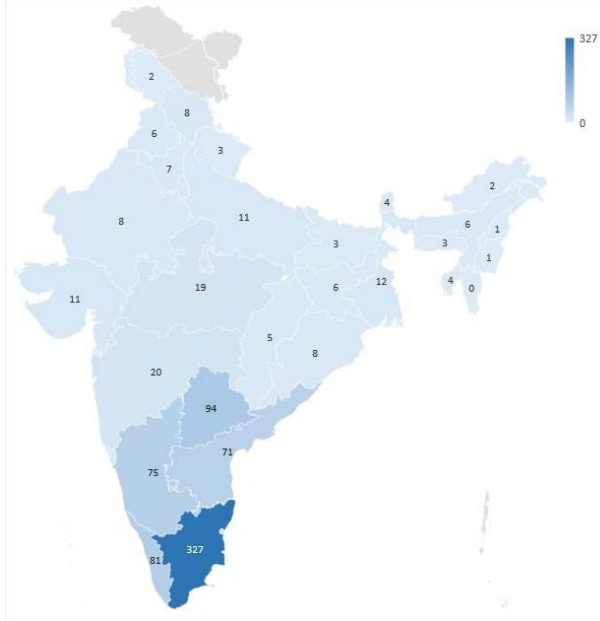

Figure-2: Prevalence of Depression, Anxiety and Stress in the study population (in %)

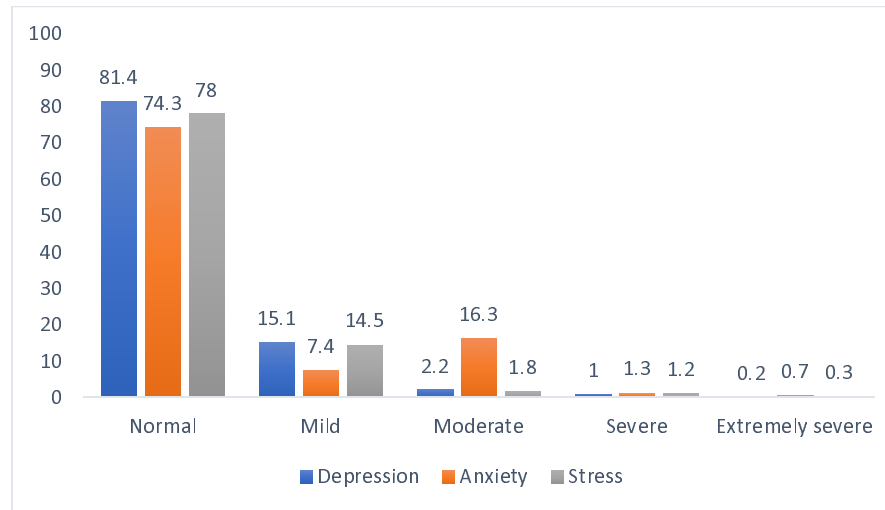

Table 1: Descriptive statistics of the study population

| Variables                         | Subgroups             | Number of participants | Percentage |
|-----------------------------------|-----------------------|------------------------|------------|
| <b>Sociodemographic variables</b> |                       |                        |            |
| Gender                            | Male                  | 473                    | 54.1       |
|                                   | Female                | 400                    | 45.9       |
| Age (years)                       | 18 to 25              | 276                    | 31.6       |
|                                   | 26 to 35              | 225                    | 22.7       |
|                                   | 36 to 45              | 269                    | 30.8       |
|                                   | 46 to 55              | 40                     | 4.5        |
|                                   | 56 & above            | 63                     | 7.2        |
|                                   | Educational status    | None                   | 28         |
| Higher secondary school           |                       | 261                    | 29.8       |
| Bachelor's degree                 |                       | 413                    | 47.3       |
| Master's degree                   |                       | 147                    | 16.8       |
| Doctorate degree                  |                       | 24                     | 2.7        |
| Marital status                    | Single                | 388                    | 44.4       |
|                                   | Married               | 469                    | 53.7       |
|                                   | Widowed/ separated    | 16                     | 1.9        |
| Employment status                 | Student               | 259                    | 29.7       |
|                                   | Employed – Government | 80                     | 9.2        |
|                                   | Employed – private    | 309                    | 35.4       |
|                                   | Self-business         | 125                    | 14.3       |
|                                   | Unemployed            | 100                    | 11.4       |
| Monthly income (INR)              | 10,000 and less       | 307                    | 35.1       |
|                                   | 10,001-20,000         | 42                     | 5.4        |
|                                   | 20,001-30,000         | 31                     | 3.5        |
|                                   | 30,001-40,000         | 75                     | 8.5        |
|                                   | 40,001-50,000         | 59                     | 6.7        |
|                                   | 50,001-100,000        | 207                    | 23.3       |
|                                   | 100,000 & above       | 152                    | 17.4       |
| Parental status                   | No kid                | 406                    | 46.5       |
|                                   | 1 kid                 | 141                    | 16.1       |
|                                   | 2 kids                | 254                    | 29.09      |
|                                   | 3 or more kids        | 72                     | 8.2        |

|                                                                                          |                      |     |      |
|------------------------------------------------------------------------------------------|----------------------|-----|------|
| Household size                                                                           | 1 member             | 12  | 1.3  |
|                                                                                          | 2 members            | 125 | 14.3 |
|                                                                                          | 3-6 members          | 708 | 81.2 |
|                                                                                          | More than 6 members  | 28  | 3.2  |
| <b>Practice of personal precautionary measures during COVID-19 outbreak and lockdown</b> |                      |     |      |
| How often do you wear mask and gloves while being outside in public places?              | No                   | 103 | 11.8 |
|                                                                                          | Sometimes            | 109 | 12.4 |
|                                                                                          | Yes                  | 661 | 75.8 |
| How often do you wash your hands with soap or hand sanitizer per day?                    | less than 5 times    | 254 | 29.1 |
|                                                                                          | 5 to 10 times        | 308 | 35.2 |
|                                                                                          | 10 to 15 times       | 227 | 26.1 |
|                                                                                          | More than 15 times   | 84  | 9.6  |
| <b>Awareness and Knowledge about COVID-19 outbreak</b>                                   |                      |     |      |
| Route of transmission                                                                    |                      |     |      |
| Contact with infected person                                                             | No                   | 193 | 22.1 |
|                                                                                          | Yes                  | 680 | 77.9 |
| Droplets                                                                                 | No                   | 252 | 28.9 |
|                                                                                          | Yes                  | 621 | 71.1 |
| Airborne                                                                                 | No                   | 676 | 77.4 |
|                                                                                          | Yes                  | 197 | 22.6 |
| Contact with contaminated objects                                                        | No                   | 282 | 32.3 |
|                                                                                          | Yes                  | 591 | 67.7 |
| Through food and water                                                                   | No                   | 816 | 93.5 |
|                                                                                          | Yes                  | 57  | 6.5  |
| Pet animals                                                                              | No                   | 853 | 97.7 |
|                                                                                          | Yes                  | 20  | 2.3  |
| Are you aware of the increase in number of COVID-19 cases in India?                      | Yes                  | 843 | 96.5 |
|                                                                                          | No                   | 30  | 3.5  |
| Source of daily information regarding COVID-19 outbreak                                  |                      |     |      |
| Internet                                                                                 | No                   | 227 | 26   |
|                                                                                          | Yes                  | 646 | 74   |
| TV                                                                                       | No                   | 164 | 18.8 |
|                                                                                          | Yes                  | 709 | 81.2 |
| Friends and relatives                                                                    | No                   | 569 | 65.1 |
|                                                                                          | Yes                  | 304 | 34.9 |
| MOH messages                                                                             | No                   | 800 | 91.6 |
|                                                                                          | Yes                  | 73  | 8.4  |
| Radio                                                                                    | No                   | 869 | 99.5 |
|                                                                                          | Yes                  | 4   | 0.5  |
| Other sources (Newspaper, magazines etc.)                                                | No                   | 821 | 94   |
|                                                                                          | Yes                  | 52  | 6    |
| Are you satisfied with the information received daily regarding COVID-19 outbreak?       | Highly satisfied     | 47  | 5.4  |
|                                                                                          | Satisfied            | 575 | 65.9 |
|                                                                                          | Not satisfied        | 106 | 12.1 |
|                                                                                          | Highly not satisfied | 34  | 3.9  |
|                                                                                          | I don't know         | 111 | 12.7 |
| How often do you check for information about COVID 19 per day?                           | Less than 5 times    | 490 | 56.1 |
|                                                                                          | Less than 10 times   | 205 | 23.5 |
|                                                                                          | Less than 20 times   | 146 | 16.7 |
|                                                                                          | More than 21 times   | 32  | 3.7  |
| <b>Personal concerns regarding COVID-19 outbreak and lockdown</b>                        |                      |     |      |
| How confident are you on your physician to diagnose COVID-19                             | Highly confident     | 110 | 12.6 |
|                                                                                          | Confident            | 528 | 60.5 |

|                                                                                                      |                      |     |      |
|------------------------------------------------------------------------------------------------------|----------------------|-----|------|
| infection?                                                                                           | Not confident        | 51  | 5.8  |
|                                                                                                      | I don't know         | 184 | 21.1 |
| How likely are you to contract COVID-19 during this outbreak?                                        | Highly likely        | 16  | 1.8  |
|                                                                                                      | Likely               | 248 | 28.4 |
|                                                                                                      | Not likely           | 345 | 39.4 |
|                                                                                                      | Highly not likely    | 89  | 10.2 |
|                                                                                                      | I don't know         | 175 | 20   |
| How likely are you to survive, if contracted with COVID-19 infection?                                | Highly likely        | 129 | 14.8 |
|                                                                                                      | Likely               | 456 | 52.2 |
|                                                                                                      | Not likely           | 55  | 6.3  |
|                                                                                                      | Highly not likely    | 20  | 2.3  |
|                                                                                                      | I don't know         | 213 | 24.4 |
| How concerned are you about your family members to contract COVID-19 infection during this outbreak? | Highly concerned     | 566 | 64.8 |
|                                                                                                      | Concerned            | 276 | 31.6 |
|                                                                                                      | Not concerned        | 11  | 1.3  |
|                                                                                                      | Highly not concerned | 12  | 1.4  |
|                                                                                                      | I don't know         | 8   | 0.9  |





|                       |       |       |       |       |       |       |       |        |       |       |       |       |
|-----------------------|-------|-------|-------|-------|-------|-------|-------|--------|-------|-------|-------|-------|
| Employed - Government | .071  | .373  | .128  | 1.090 | .540  | 1.242 | .621  | 2.482  | .997  | .042  | .009  | .103  |
| Employed – private    | .038  | 1.639 | 1.027 | 2.616 | .001  | 2.124 | 1.368 | 3.297  | .003  | 1.969 | 1.252 | 3.097 |
| Self-business         | .000  | 2.869 | 1.680 | 4.902 | .000  | 4.267 | 2.575 | 7.069  | .000  | 3.852 | 2.298 | 6.457 |
| Unemployed            | .000  | 3.338 | 1.907 | 5.844 | .000  | 6.149 | 3.620 | 10.444 | .000  | 5.603 | 3.274 | 9.589 |
| Monthly income (INR)  | 0.000 |       |       |       | 0.004 |       |       |        | 0.003 |       |       |       |
| 10,000 and less       | -     | -     | -     | -     | -     | -     | -     | -      | -     | -     | -     | -     |
| 10,001-20,000         | .169  | .472  | .162  | 1.376 | .840  | 1.079 | .517  | 2.249  | .052  | .383  | .146  | 1.010 |
| 20,001-30,000         | .998  | .002  | .000  | .016  | .197  | 1.672 | .766  | 3.647  | .998  | .007  | .000  | .015  |
| 30,001-40,000         | .102  | 2.378 | 1.363 | 4.150 | .416  | 1.262 | .720  | 2.210  | .566  | 1.178 | .674  | 2.059 |
| 40,001-50,000         | .997  | .004  | .000  | .023  | .997  | .018  | .004  | .048   | .997  | .017  | .000  | .031  |
| 50,001-100,000        | .001  | .052  | .358  | 1.099 | .203  | .800  | .228  | 1.640  | .187  | 1.299 | .881  | 1.916 |
| 100,000 & above       | .002  | .350  | .177  | .689  | .042  | .657  | .402  | 1.072  | .002  | .430  | .252  | .734  |
| Parental status       | 0.000 |       |       |       | 0.000 |       |       |        | 0.000 |       |       |       |
| No kid                | .000  | .067  | .036  | .123  | .000  | .084  | .044  | .159   | .000  | .047  | .024  | .091  |
| 1 kid                 | .000  | .002  | .000  | .016  | .000  | .013  | .005  | .034   | .000  | .003  | .001  | .013  |
| 2 kids                | .000  | .035  | .018  | .070  | .000  | .047  | .024  | .094   | .000  | .053  | .026  | .105  |
| 3 or more kids*       | -     | -     | -     | -     | -     | -     | -     | -      | -     | -     | -     | -     |
| Household size        | 0.000 |       |       |       | 0.026 |       |       |        | 0.000 |       |       |       |
| 1 member              | .764  | 1.250 | .292  | 5.348 | .722  | .773  | .187  | 3.196  | .999  | .005  | .000  | .015  |
| 2 members             | .000  | .083  | .023  | .300  | .008  | .294  | .120  | .722   | .000  | .029  | .008  | .099  |
| 3-6 members           | .314  | .649  | .280  | 1.504 | .147  | .563  | .259  | 1.223  | .001  | .280  | .131  | .601  |
| More than 6 members*  | -     | -     | -     | -     |       |       |       |        |       |       |       |       |

Abbreviations: cOR, crude odds ratio; 95% CI, 95% confidence interval; \* Reference group

Table 3: Bivariate analysis of COVID-19 outbreak & lockdown related variables using binary logistic regression

|  | Depression |     |        | Anxiety |     |        | Stress  |         |    |
|--|------------|-----|--------|---------|-----|--------|---------|---------|----|
|  | P value    | cOR | 95% CI | P value | cOR | 95% CI | P value | 95% cOR | CI |

|                                                                                     |       |       | <i>Lower</i> | <i>Upper</i> |       |       | <i>Lower</i> | <i>upper</i> |       | <i>Lower</i> | <i>upper</i> |       |
|-------------------------------------------------------------------------------------|-------|-------|--------------|--------------|-------|-------|--------------|--------------|-------|--------------|--------------|-------|
| <b>Wearing mask and gloves while being outside in public places</b>                 | 0.066 |       |              |              | 0.054 |       |              |              | 0.648 |              |              |       |
| No*                                                                                 | -     | -     | -            | -            | -     | -     | -            | -            | -     | -            | -            |       |
| Sometimes                                                                           | .571  | .794  | .358         | 1.763        | .017  | 2.180 | 1.152        | 4.127        | .518  | 1.248        | .637         | 2.447 |
| Yes                                                                                 | .176  | 1.492 | .836         | 2.663        | .121  | 1.519 | .896         | 2.574        | .352  | 1.287        | .757         | 2.186 |
| <b>Frequency of washing hands with soap or hand sanitizer per day</b>               | 0.000 |       |              |              | 0.000 |       |              |              | .000  |              |              |       |
| Less than 5 times                                                                   | .000  | .091  | .052         | .161         | .000  | .108  | .062         | .188         | .000  | .084         | .047         | .149  |
| 5 to 10 times                                                                       | .000  | .040  | .022         | .074         | .000  | .117  | .068         | .200         | .000  | .054         | .030         | .098  |
| 10 to 15 times                                                                      | .000  | .101  | .057         | .179         | .000  | .166  | .096         | .287         | .000  | .139         | .080         | .242  |
| More than 15 times*                                                                 | -     | -     | -            | -            | -     | -     | -            | -            | -     | -            | -            | -     |
| <b>Awareness of increase in number of COVID-19 cases</b>                            |       |       |              |              |       |       |              |              |       |              |              |       |
| Yes                                                                                 | 0.998 | 3.42  | 1.80         | 4.30         | 0.74  | 0.59  | 0.041        | 1.023        | 0.52  | 2.51         | 0.962        | 2.985 |
| No                                                                                  | -     | -     | -            | -            | -     | -     | -            | -            | -     | -            | -            | -     |
| <b>Satisfaction with the information received daily regarding COVID-19 outbreak</b> | .212  |       |              |              | .000  |       |              |              | .040  |              |              |       |
| Highly satisfied                                                                    | .023  | .235  | .067         | .820         | .023  | .276  | .091         | .837         | .004  | .161         | .047         | .556  |
| Satisfied                                                                           | .411  | .814  | .498         | 1.330        | .783  | .936  | .586         | 1.496        | .099  | .684         | .435         | 1.074 |
| Not satisfied                                                                       | .229  | .657  | .332         | 1.302        | .159  | 1.524 | .847         | 2.743        | .064  | .550         | .291         | 1.037 |
| Highly not satisfied                                                                | .812  | .892  | .347         | 2.290        | .103  | 3.335 | 1.501        | 7.408        | .300  | .613         | .243         | 1.546 |
| I don't know                                                                        | -     | -     | -            | -            | -     | -     | -            | -            | -     | -            | -            | -     |

|                                                                        |      |       |       |        |      |       |       |        |      |       |       |        |
|------------------------------------------------------------------------|------|-------|-------|--------|------|-------|-------|--------|------|-------|-------|--------|
| <b>Frequency of checking for information about COVID 19 per day</b>    | .000 |       |       |        | .000 |       |       |        |      | .000  |       |        |
| Less than 5 times                                                      | .043 | .419  | .180  | .974   | .759 | .879  | .384  | 2.010  | .243 | 2.058 | .613  | 6.909  |
| Less than 10 times                                                     | .121 | .494  | .203  | 1.205  | .517 | .750  | .314  | 1.791  | .361 | 1.788 | .514  | 6.223  |
| Less than 20 times                                                     | .046 | 2.407 | 1.014 | 5.713  | .054 | 2.341 | .987  | 5.557  | .000 | 9.151 | 2.669 | 31.376 |
| More than 21 times                                                     | -    | -     | -     | -      | -    | -     | -     | -      | -    | -     | -     | -      |
| <b>Level of confidence on physician to diagnose COVID-19 infection</b> | .000 |       |       |        | .000 |       |       |        |      | .000  |       |        |
| Highly confident                                                       | .129 | 1.467 | .894  | 2.407  | .883 | 1.037 | .640  | 1.681  | .402 | 1.233 | .756  | 2.011  |
| Confident                                                              | .000 | .293  | .194  | .443   | .000 | .315  | .217  | .458   | .000 | .358  | .244  | .526   |
| Not confident                                                          | .002 | .143  | .043  | .478   | .808 | .924  | .487  | 1.752  | .001 | .120  | .036  | .401   |
| I don't know                                                           | -    | -     | -     | -      | -    | -     | -     | -      | -    | -     | -     | -      |
| <b>Likelihood of contracting COVID-19</b>                              | .000 |       |       |        | .000 |       |       |        |      | .000  |       |        |
| Highly likely                                                          | .007 | 4.650 | 1.526 | 14.168 | .001 | 6.292 | 2.157 | 18.351 | .022 | 3.375 | 1.191 | 9.564  |
| Likely                                                                 | .011 | 2.056 | 1.178 | 3.589  | .014 | 1.921 | 1.140 | 3.235  | .823 | 1.054 | .666  | 1.666  |
| Not likely                                                             | .334 | 1.314 | .755  | 2.285  | .000 | 2.568 | 1.574 | 4.190  | .014 | .559  | .351  | .889   |
| Highly not likely                                                      | .000 | 4.791 | 2.546 | 9.015  | .000 | 3.889 | 2.120 | 7.136  | .003 | 2.292 | 1.321 | 3.978  |
| I don't know                                                           | -    | -     | -     | -      | -    | -     | -     | -      | -    | -     | -     | -      |
| <b>Likelihood of surviving, if infected with COVID-19</b>              | .000 |       |       |        | .302 |       |       |        |      | .000  |       |        |
| Highly likely                                                          | .000 | .322  | .177  | .587   | .397 | .811  | .500  | 1.317  | .000 | .269  | .146  | .494   |
| Likely                                                                 | .000 | .413  | .280  | .608   | .029 | .668  | .465  | .959   | .001 | .538  | .373  | .774   |
| Not likely                                                             | .997 | .000  | .000  | .      | .549 | .817  | .422  | 1.581  | .997 | .000  | .000  | .      |
| Highly not likely                                                      | .031 | 2.783 | 1.100 | 7.039  | .998 | .000  | .000  | .      | .019 | 3.064 | 1.198 | 7.838  |

|                                                          |      |        |      |         |      |       |      |        |      |       |      |        |
|----------------------------------------------------------|------|--------|------|---------|------|-------|------|--------|------|-------|------|--------|
| I don't know                                             | -    | -      | -    | -       | -    | -     | -    | -      | -    | -     | -    | -      |
| <b>Level of concern on family members to be infected</b> | .000 |        |      |         | .001 |       |      |        | .000 |       |      |        |
| Highly concerned                                         | .080 | .286   | .071 | 1.161   | .196 | .398  | .098 | 1.609  | .107 | .316  | .078 | 1.282  |
| Concerned                                                | .316 | 2.667  | .391 | 18.166  | .554 | 1.750 | .275 | 11.152 | .554 | 1.750 | .275 | 11.152 |
| Not concerned                                            | .000 | .049   | .011 | .220    | .044 | .232  | .056 | .959   | .006 | .136  | .032 | .569   |
| Highly not concerned                                     | .057 | 11.000 | .928 | 130.324 | .999 | .000  | .000 | .      | .999 | .317  | .090 | .742   |
| I don't know                                             | -    | -      | -    | -       | -    | -     | -    | -      | -    | -     | -    | -      |

Abbreviations: cOR, crude odds ratio; 95% CI, 95% confidence interval; \* Reference group

Table-4: Multiple logistic regression analysis for depression and its correlates

| Variables                                                             | Categories          | B      | S.E.   | Wald   | P value | aOR   | 95% CI for aOR |        |
|-----------------------------------------------------------------------|---------------------|--------|--------|--------|---------|-------|----------------|--------|
|                                                                       |                     |        |        |        |         |       | Lower          | Upper  |
| <b>Gender</b>                                                         | Male*               | -      | -      | -      | -       | -     | -              | -      |
|                                                                       | Female              | 1.367  | .545   | 6.300  | .012    | 3.924 | 1.349          | 11.412 |
| <b>Parental status</b>                                                | No kid              | 2.805  | 4.960  | .320   | .572    | 6.529 | .001           | 30.392 |
|                                                                       | One kid             | -5.463 | 44.341 | .008   | .930    | 0.396 | .053           | .461   |
|                                                                       | Two kids            | -1.572 | 3.955  | 4.698  | .030    | 0.189 | .051           | 0.440  |
|                                                                       | Three or more kids* | -      | -      | -      | -       | -     | -              | -      |
| <b>Frequency of washing hands with soap or hand sanitizer per day</b> |                     |        |        | 10.139 | .017    |       |                |        |
|                                                                       | Less than 5 times   | -1.265 | .725   | 3.047  | .081    | .282  | .068           | 1.168  |
|                                                                       | 5 to 10 times       | -1.877 | .644   | 8.498  | .004    | .153  | .043           | .541   |
|                                                                       | 10 to 15 times      | -1.615 | .753   | 4.593  | .032    | .199  | .045           | .871   |

|                                                                                     |                      |        |       |        |      |       |      |        |
|-------------------------------------------------------------------------------------|----------------------|--------|-------|--------|------|-------|------|--------|
|                                                                                     | More than 15 times*  | -      | -     | -      | -    | -     | -    | -      |
| <b>Satisfaction with the information received daily regarding COVID-19 outbreak</b> |                      |        |       | 20.434 | .000 |       |      |        |
|                                                                                     | Highly satisfied     | -3.608 | 3.813 | .895   | .344 | .127  | .089 | 17.758 |
|                                                                                     | Satisfied            | -8.529 | 1.916 | 19.818 | .000 | .405  | .159 | .740   |
|                                                                                     | Not satisfied        | -2.440 | 1.594 | 2.342  | .126 | .087  | .004 | 1.984  |
|                                                                                     | Highly not satisfied | 4.762  | 9.993 | .000   | .998 | .599  | .000 | 2.105  |
|                                                                                     | I don't know         | -      | -     | -      | -    | -     | -    | -      |
| <b>Level of confidence on physician to diagnose COVID-19 infection</b>              |                      |        |       | 18.363 | .000 |       |      |        |
|                                                                                     | Highly confident     | .692   | .544  | 1.619  | .203 | 1.998 | .688 | 5.807  |
|                                                                                     | Confident            | -1.116 | .466  | 5.738  | .017 | .328  | .132 | .816   |
|                                                                                     | Not confident        | -.292  | .971  | .090   | .764 | .747  | .111 | 5.006  |
|                                                                                     | I don't know         | -      | -     | -      | -    | -     | -    | -      |
| <b>Likelihood of contracting COVID-19</b>                                           |                      |        |       | 15.302 | .004 |       |      |        |
|                                                                                     | Highly likely        | -.121  | .902  | .018   | .893 | .886  | .151 | 5.193  |
|                                                                                     | Likely               | -.988  | .562  | 3.096  | .078 | .372  | .124 | 1.119  |
|                                                                                     | Not likely           | -.097  | .503  | 5.782  | .016 | .151  | .021 | .294   |
|                                                                                     | Highly not likely    | -1.504 | .626  | .037   | .847 | .907  | .338 | 2.432  |
|                                                                                     | I don't know*        | -      | -     | -      | -    | -     | -    | -      |

Abbreviations: aOR, adjusted odds ratio; 95% CI, 95% confidence interval; \* Reference group

Table-5: Multiple logistic regression analysis for anxiety and its correlates

| Variables                                                           | Categories              | B      | S.E.  | Wald   | P value | aOR   | 95% CI for aOR |        |
|---------------------------------------------------------------------|-------------------------|--------|-------|--------|---------|-------|----------------|--------|
|                                                                     |                         |        |       |        |         |       | Lower          | Upper  |
| <b>Gender</b>                                                       | Male*                   | -      | -     | -      | -       | -     | -              | -      |
|                                                                     | Female                  | 1.248  | .266  | 21.947 | .000    | 3.483 | 2.066          | 5.870  |
| <b>Educational status</b>                                           | None*                   | -      | -     | -      | -       | -     | -              | -      |
|                                                                     | Higher secondary school | -2.069 | 1.104 | 3.516  | .061    | .126  | .015           | 1.098  |
|                                                                     | Bachelor degree         | -.883  | .971  | .826   | .363    | .414  | .062           | 2.775  |
|                                                                     | Master degree           | -2.221 | 1.014 | 4.795  | .029    | .108  | .015           | .592   |
|                                                                     | Doctorate degree        | .025   | 1.239 | .000   | .984    | 1.026 | .090           | 11.626 |
|                                                                     |                         |        |       |        | 11.472  | 0.022 |                |        |
| <b>Employment status</b>                                            | Student*                | -      | -     | -      | -       | -     | -              | -      |
|                                                                     | Employed - Government   | 1.045  | .798  | 1.717  | .190    | 2.845 | .596           | 13.584 |
|                                                                     | Employed – private      | 1.324  | .601  | 4.856  | .028    | 3.757 | 1.158          | 12.191 |
|                                                                     | Self-business           | 1.440  | .696  | 4.281  | .039    | 4.222 | 1.079          | 16.523 |
|                                                                     | Unemployed              | 1.674  | .498  | 11.293 | .001    | 5.335 | 2.009          | 14.164 |
| <b>Frequency of checking for information about COVID 19 per day</b> |                         |        |       | 9.651  | .022    |       |                |        |
|                                                                     | Less than 5 times       | -.892  | .847  | 1.109  | .029    | .410  | .078           | .657   |
|                                                                     | Less than 10 times      | -.167  | .740  | .051   | .821    | .846  | .198           | 3.607  |
|                                                                     | Less than 20 times      | .875   | .939  | .869   | .351    | 2.400 | .381           | 15.121 |

|                                                                        |                     |        |      |        |      |       |       |        |
|------------------------------------------------------------------------|---------------------|--------|------|--------|------|-------|-------|--------|
|                                                                        | More than 21 times* | -      | -    | -      | -    | -     | -     | -      |
| <b>Level of confidence on physician to diagnose COVID-19 infection</b> |                     |        |      | 12.598 | .006 |       |       |        |
|                                                                        | Highly confident    | .169   | .613 | .076   | .782 | 1.185 | .356  | 3.942  |
|                                                                        | Confident           | -1.220 | .520 | 5.503  | .019 | .295  | .107  | .818   |
|                                                                        | Not confident       | .389   | .946 | .169   | .681 | 1.475 | .231  | 9.418  |
|                                                                        | I don't know*       | -      | -    | -      | -    | -     | -     | -      |
| <b>Likelihood of contracting COVID-19</b>                              |                     |        |      | 19.332 | .001 |       |       |        |
|                                                                        | Highly likely       | .672   | .964 | .486   | .486 | 1.959 | .296  | 12.965 |
|                                                                        | Likely              | -.970  | .563 | 2.976  | .085 | .379  | .126  | 1.141  |
|                                                                        | Not likely          | -.023  | .515 | 1.002  | .014 | .777  | .356  | .981   |
|                                                                        | Highly not likely   | 1.887  | .634 | 8.867  | .403 | 6.599 | 1.906 | 22.850 |
|                                                                        | I don't know*       | -      | -    | -      | -    | -     | -     | -      |

Abbreviations: aOR, adjusted odds ratio; 95% CI, 95% confidence interval; \* Reference group

Table-6: Multiple logistic regression analysis for stress and its correlates

| Variables          | Categories | B      | S.E.  | Wald   | P value | aOR  | 95% CI for aOR |        |
|--------------------|------------|--------|-------|--------|---------|------|----------------|--------|
|                    |            |        |       |        |         |      | Lower          | Upper  |
| <b>Age (years)</b> |            |        |       | 14.055 | .007    |      |                |        |
|                    | 18 to 25*  | -      | -     | -      | -       | -    | -              | -      |
|                    | 26 to 35   | -3.543 | 2.130 | 2.766  | .096    | .029 | .000           | 1.882  |
|                    | 36 to 45   | -5.531 | 2.290 | 5.832  | .016    | .14  | .102           | .353   |
|                    | 46 to 55   | -4.912 | 1.832 | 7.190  | .007    | .17  | .094           | .267   |
|                    | 56 & above | -.526  | 2.557 | .042   | .837    | .591 | .004           | 18.803 |



|                                                                                    |                         |        |       |        |      |        |       |         |
|------------------------------------------------------------------------------------|-------------------------|--------|-------|--------|------|--------|-------|---------|
| <b>marital status</b>                                                              |                         |        |       | 19.503 | .000 |        |       |         |
|                                                                                    | Single*                 | -      | -     | -      | -    | -      | -     | -       |
|                                                                                    | Married                 | 7.753  | 1.756 | 19.493 | .000 | 2.502  | 1.701 | 8.924   |
|                                                                                    | Widowed/<br>separated   | 5.100  | 1.931 | 6.974  | .008 | 10.411 | 1.037 | 14.566  |
| <b>Household size</b>                                                              |                         |        |       | 18.370 | .000 |        |       |         |
|                                                                                    | 1 member                | -1.996 | .927  | 4.634  | .031 | .136   | .022  | .836    |
|                                                                                    | 2 members               | -5.705 | 1.104 | 26.699 | .000 | .213   | .100  | .429    |
|                                                                                    | 3-6 members             | -2.954 | .818  | 13.036 | .000 | .352   | .181  | .559    |
|                                                                                    | More than 6<br>members* | -      | -     | -      | -    | -      | -     | -       |
| <b>Level of confidence<br/>on physician to<br/>diagnose COVID-19<br/>infection</b> |                         |        |       | 16.540 | .001 |        |       |         |
|                                                                                    | Highly confident        | 2.610  | 1.174 | 4.947  | .126 | 3.603  | 1.363 | 135.729 |
|                                                                                    | Confident               | -5.012 | 1.648 | 9.251  | .002 | .807   | .450  | .968    |
|                                                                                    | Not confident           | -6.395 | 2.517 | 6.456  | .011 | .002   | .001  | .232    |
|                                                                                    | I don't know*           | -      | -     | -      | -    | -      | -     | -       |
| <b>Likelihood of<br/>contracting COVID-<br/>19</b>                                 |                         |        |       | 22.887 | .000 |        |       |         |
|                                                                                    | Highly likely           | -1.308 | .949  | 1.899  | .168 | .270   | .042  | 1.737   |
|                                                                                    | Likely                  | 2.161  | .754  | 8.220  | .004 | 1.115  | 1.026 | 1.505   |
|                                                                                    | Not likely              | -5.219 | 1.102 | 22.441 | .000 | .005   | .001  | .047    |
|                                                                                    | Highly not likely       | -2.510 | 1.634 | 2.359  | .125 | .081   | .003  | 2.000   |
|                                                                                    | I don't know*           | -      | -     | -      | -    | -      | -     | -       |

Abbreviations: aOR, adjusted odds ratio; 95% CI, 95% confidence interval; \* Reference group
